# Supplementary material
Source: PubMed Central journal article supplement (PMC3521786)
Supplement: 12_174_Vene.Suppl.pdf [file 12_174_Vene.Suppl.pdf]

# Xanthohumol Impairs Human Prostate Cancer Cell Growth and Invasion and Diminishes the Incidence and Progression of Advanced Tumors in TRAMP Mice

Roberta Venè,<sup>1</sup> Roberto Benelli,<sup>2</sup> Simona Minghelli,<sup>3</sup> Simonetta Astigiano,<sup>4</sup> Francesca Tosetti,<sup>1</sup> and Nicoletta Ferrari<sup>1</sup>

Online address: <http://www.molmed.org>

The Feinstein Institute for Medical Research 

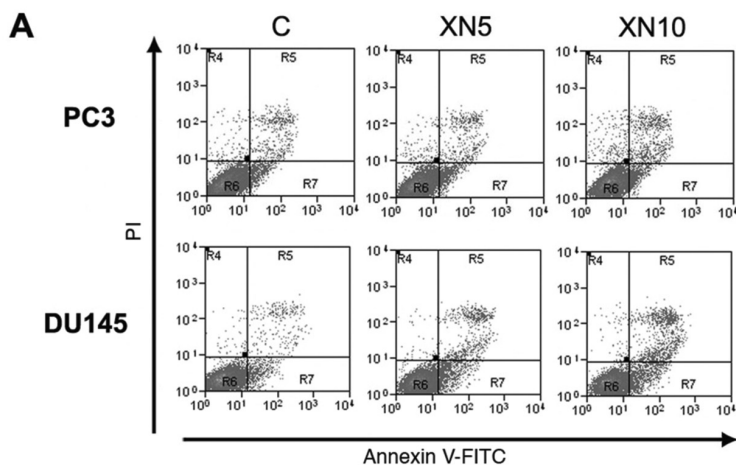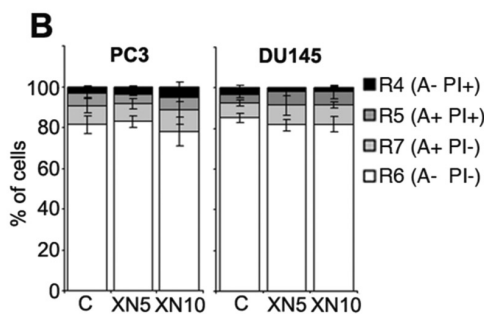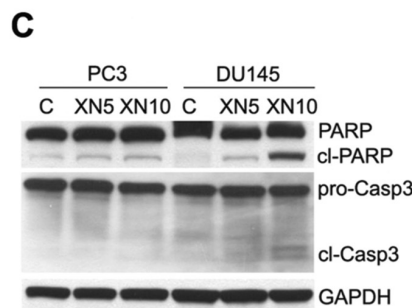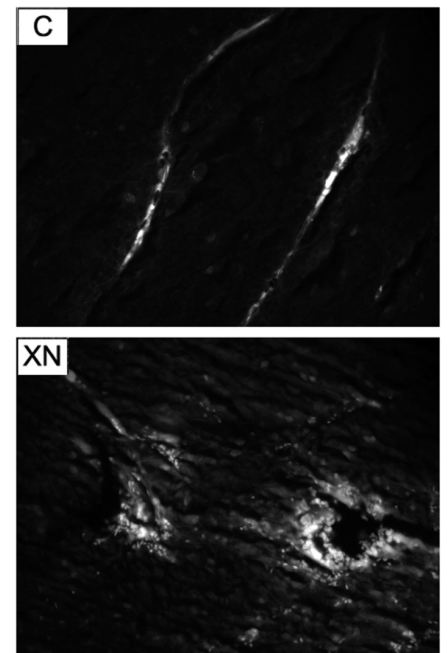

**Supplementary Figure S2.** Vessel analyses from 10  $\mu\text{m}$ -thick tissue slices of PD samples show a mature vasculature covering large areas of the tumor in control samples (C); this structure is lost in XN treated mice (XN) where disrupted vessels with extravascular erythrocytes are evident (40X magnification).

**Supplementary Figure S1.** Apoptosis evaluation in prostate cancer cells treated for 96 h with 5-10 $\mu\text{M}$  XN. FACS analysis of Annexin V-FITC/propidium iodide (PI) stained cells did not show any relevant increase of Annexin V positive cells in the presence of XN. Representative dot plots from one experiment are shown (A). Percentage of cells in each gate is shown in panel B (pooled data from three independent experiments are presented as mean +SD). Western blot analysis for PARP-1 and Caspase-3 revealed faint cleaved fragments (cl-PARP and cl-Casp3) only in DU145 cells treated with 10 $\mu\text{M}$  XN. The experiment was repeated twice with similar results.
